# Supplementary material for: MicroRNA-214 targets PTK6 to inhibit tumorigenic potential and increase drug sensitivity of prostate cancer cells
Source: PubMed Central journal article supplement (PMC6611815; doi:10.1038/s41598-019-46170-3), 2019-07-05
Supplement: 41598_2019_46170_MOESM1_ESM.pdf [file 41598_2019_46170_MOESM1_ESM.pdf]

# **MicroRNA-214 targets PTK6 to inhibit tumorigenic potential and increase drug sensitivity of prostate cancer cells**

Patrice Cagle<sup>1</sup>, Suryakant Niture<sup>1</sup>, Anvesha Srivastava<sup>2</sup>, Malathi Ramalinga<sup>2</sup>, Rasha Aqeel<sup>2</sup>, Leslimar Rios-Colon<sup>1</sup>, Uchechukwu Chimeh<sup>1</sup>, Simeng Suy<sup>4</sup>, Sean P. Collins<sup>4</sup>, Rajvir Dahiya<sup>5</sup> and Deepak Kumar<sup>1,2,3\*</sup>

<sup>1</sup>Julius L. Chambers Biomedical Biotechnology Research Institute, North Carolina Central University, Durham, NC 27707

<sup>2</sup>Cancer Research Laboratory, Division of Science and Mathematics, University of the District of Columbia, Washington, DC 20008

<sup>3</sup>Department of Pharmaceutical Sciences, North Carolina Central University, Durham, NC 27707

<sup>4</sup>Department of Radiation Medicine, Georgetown University, Washington, DC 20057

<sup>5</sup>VA Medical Center and University of California San Francisco CA 94121

**Supplementary material**

**S2.C**

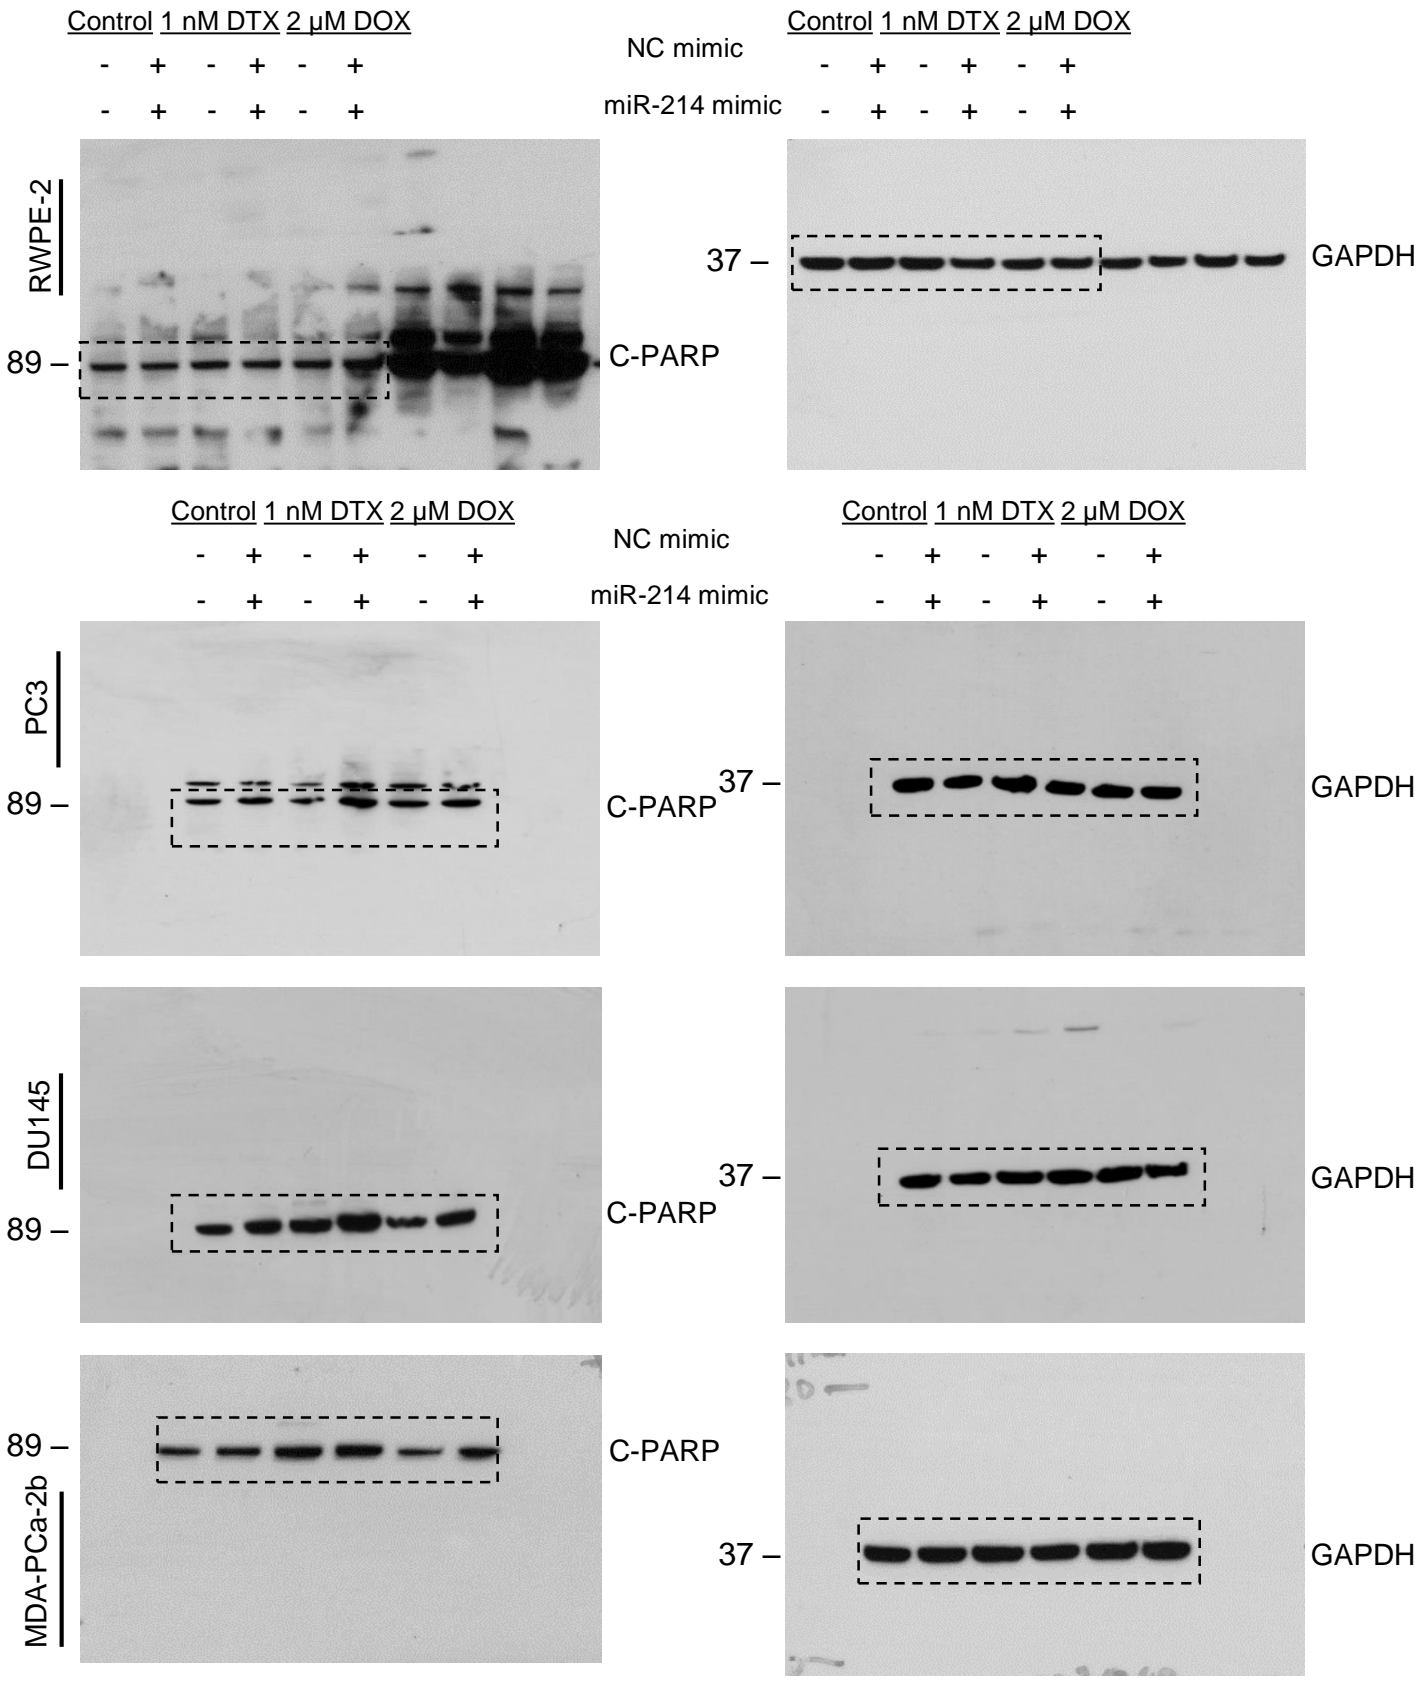

**Supplementary figure 2.C (S2.C):** Full length images of blots for Fig 2 C in main paper. Dotted rectangles indicate the regions used in the figures. PVDF membranes were used for probing with the respective primary antibody.

**S3.E**

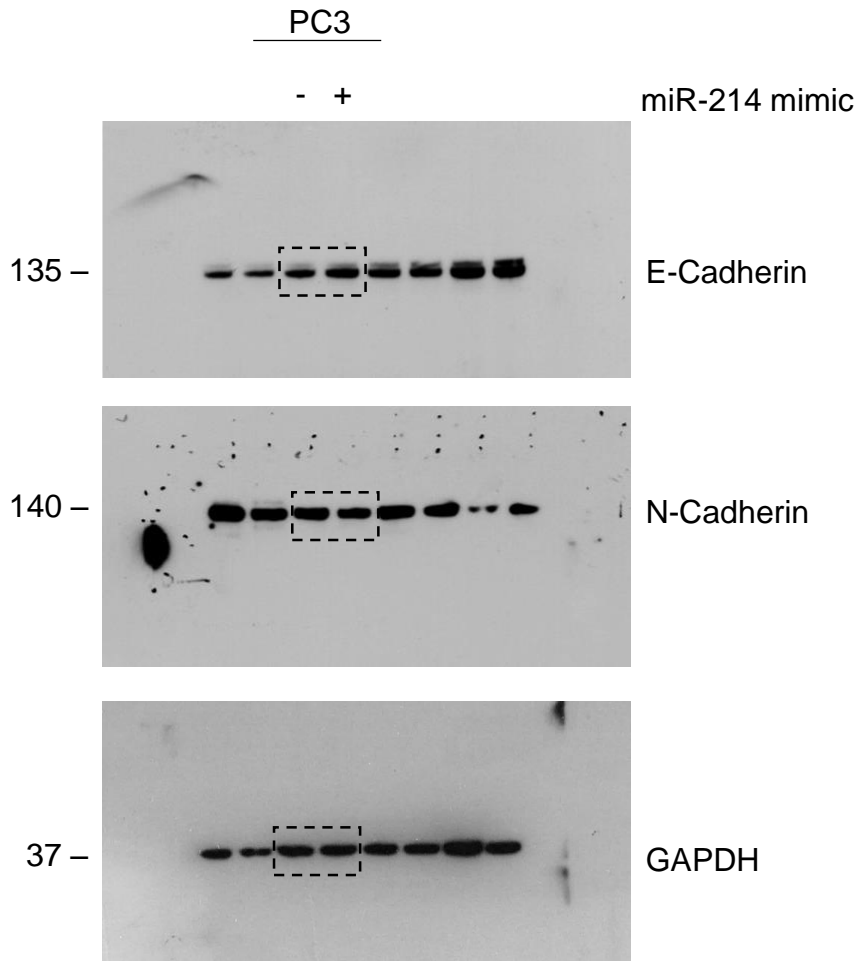

**Supplementary figure 3.E (S3.E):** Full length images of blots for Fig 3 E in main paper. Dotted rectangles indicate the regions used in the figures. PVDF membranes were used for probing with the respective primary antibody.

**S4.D**

|  |               |   |            |   |              |   |                   |   |               |
|--|---------------|---|------------|---|--------------|---|-------------------|---|---------------|
|  | <u>RWPE-2</u> |   | <u>PC3</u> |   | <u>DU145</u> |   | <u>MDA-PCa-2b</u> |   |               |
|  | -             | + | -          | + | -            | + | -                 | + | NC mimic      |
|  | -             | + | -          | + | -            | + | -                 | + | miR-214 mimic |

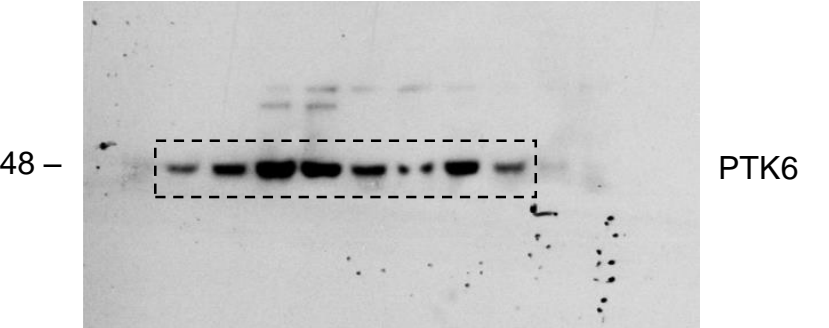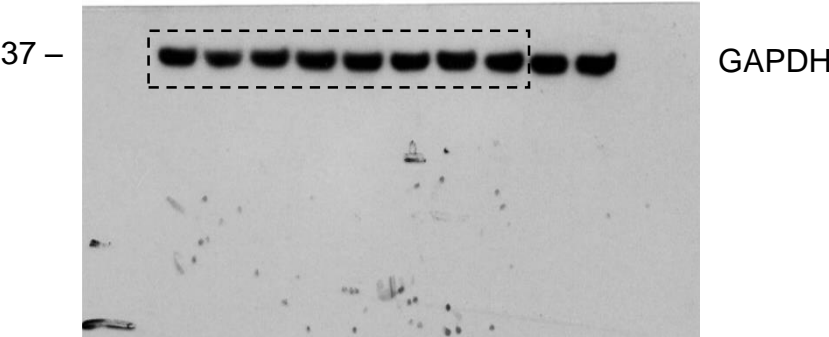

**Supplementary figure 4.D (S4.D):** Full length images of blots for Fig 4 D in main paper. Dotted rectangles indicate the regions used in the figures. PVDF membranes were used for probing with the respective primary antibody.

**S4.F**

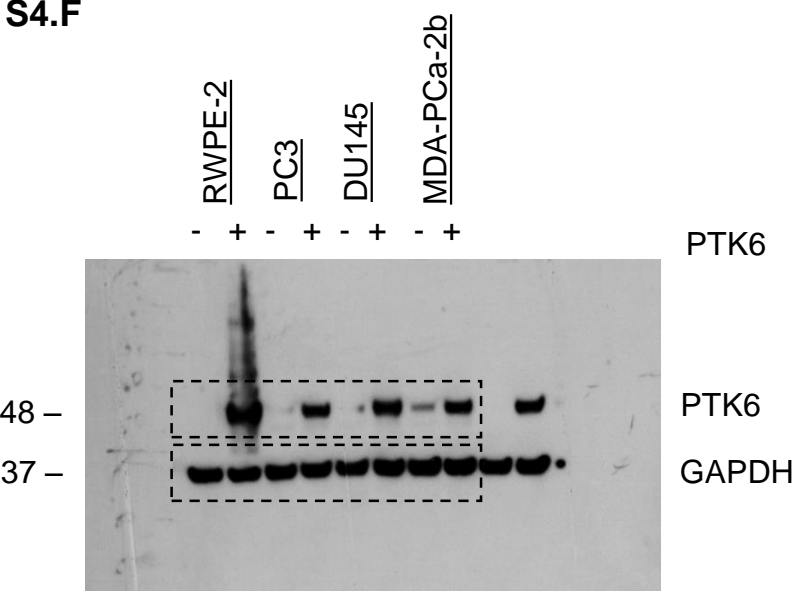

**Supplementary figure 4.F (S4.F):** Full length images of blots for Fig 4 F in main paper. Dotted rectangles indicate the regions used in the figures. PVDF membranes were used for probing with the respective primary antibody.

**S5.A**

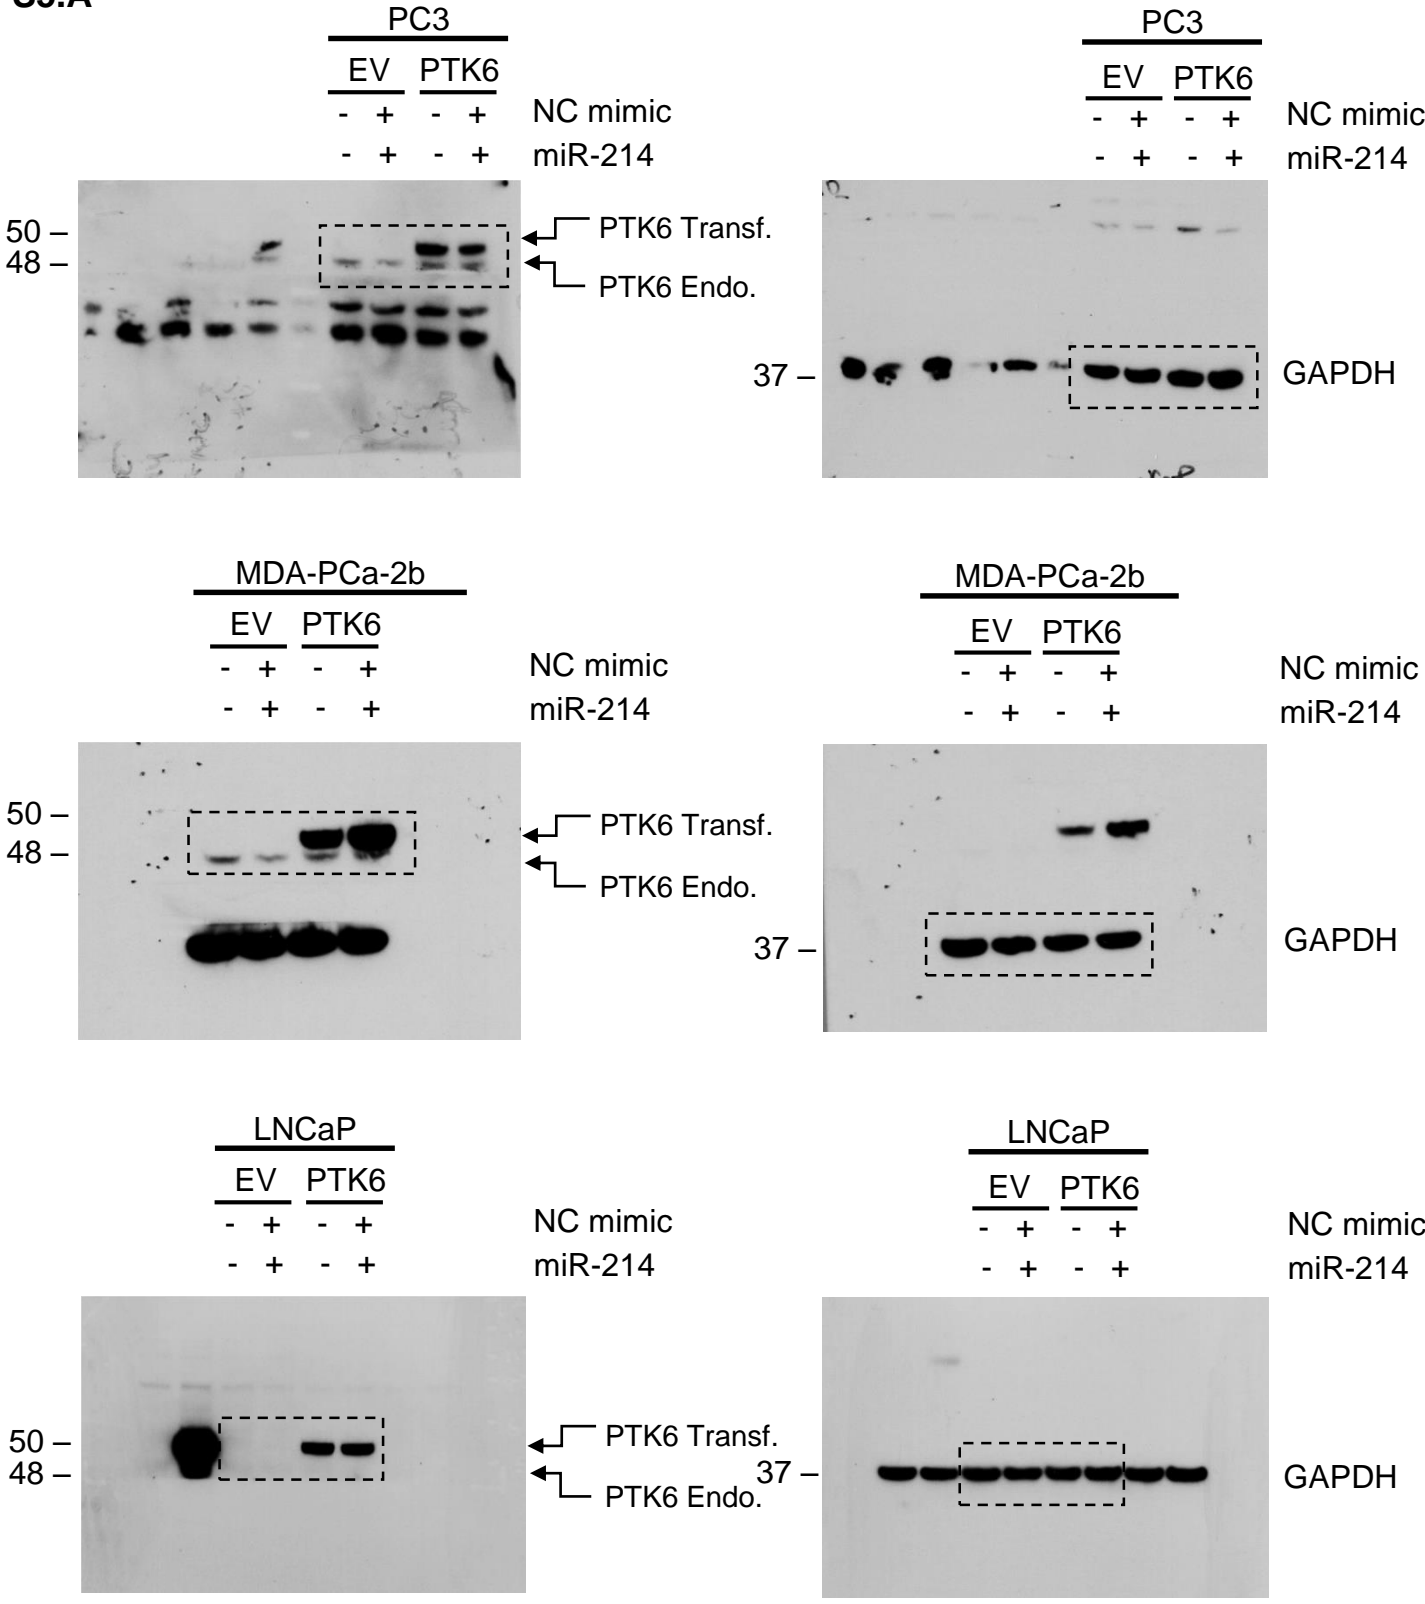

**Supplementary figure 5.A (S5.A):** Full length images of blots for Fig 5 A in main paper. Dotted rectangles indicate the regions used in the figures. PVDF membranes were used for probing with the respective primary antibody.
